# Supplementary material for: Hand Tremor Questionnaire: A Useful Screening Tool for Differentiating Patients with Hand Tremor between Parkinson's Disease and Essential Tremor
Source: PubMed Central journal article supplement — J Clin Neurol. 2018 Jun 29;14(3):381–6. doi: 10.3988/jcn.2018.14.3.381 (PMC6031988; doi:10.3988/jcn.2018.14.3.381), 2018-06-29
Supplement: jcn-14-381-s001.pdf [file jcn-14-381-s001.pdf]

**Supplementary Table 1.** Hand Tremor Questionnaire

|    | <b>Question</b>                                                                                          | <b>Yes</b> | <b>No</b> | <b>Uncertain</b> |
|----|----------------------------------------------------------------------------------------------------------|------------|-----------|------------------|
| 1  | Does your hand tremor worsen when you relax your arms?                                                   |            |           |                  |
| 2  | Does your hand tremor worsen while focusing on something? (e.g., watching TV or talking)                 |            |           |                  |
| 3  | Does your hand tremor worsen (e.g., you can't feel it or realize it is there) when someone looks at you? |            |           |                  |
| 4  | Does your tremor in one hand worsen more than in the other hand, or does only one hand show tremor?      |            |           |                  |
| 5  | Did your hand tremor start to develop on one side only?                                                  |            |           |                  |
| 6  | Did your tremor in both hands start to develop at similar times?                                         |            |           |                  |
| 7  | Currently, are both of your hands shaking similarly?                                                     |            |           |                  |
| 8  | Does your hand tremor worsen when holding something or stretching your arm?                              |            |           |                  |
| 9  | Does your hand tremor worsen when using chopsticks or a spoon?                                           |            |           |                  |
| 10 | Does your hand tremor worsen when you write letters?                                                     |            |           |                  |
| 11 | Does your hand tremor worsen when holding something? (e.g., a cup or cellular phone)                     |            |           |                  |
| 12 | Does your hand tremor reduce when drinking alcohol, or worsen when sobering up after drinking alcohol?   |            |           |                  |

This questionnaire was developed to discriminate between Parkinson's disease and essential tremor, and was also aimed at obtaining more-precise information about hand tremor from a subject with Parkinson's disease or essential tremor. Please provide only one answer for each question (using '0' or a tick).
